# 1 Indirect genetic effects clarify how traits can evolve even when 2 fitness does not

3  
4 David N. Fisher<sup>1,2\*</sup> and Andrew G. McAdam<sup>1</sup>

5 1. Department for Integrative Biology, University of Guelph, Guelph, Ontario N1G 2W1,  
6 Canada

7 2. Department of Psychology, Neuroscience & Behaviour, McMaster University,  
8 Hamilton, Ontario L8S 4K1, Canada

9

10 \* [davidnfisher@hotmail.com](mailto:davidnfisher@hotmail.com)

11

## 12 Abstract

13 There are many situations in nature where we expect traits to evolve but not necessarily for  
14 mean fitness to increase. However, these scenarios are hard to reconcile simultaneously  
15 with Fisher's Fundamental Theorem of Natural Selection and the Price identity. The  
16 consideration of indirect genetic effects on fitness reconciles these fundamental theorems  
17 with the observation that traits sometimes evolve without any adaptation, by explicitly  
18 considering the correlated evolution of the social environment, which is a form of  
19 transmission bias. While transmission bias in the Price identity is often assumed to be  
20 absent, here we show that explicitly considering indirect genetic effects as a form of  
21 transmission bias for fitness has several benefits: 1) it makes clear how traits can evolve  
22 while mean fitness remains stationary, 2) it reconciles the fundamental theorem of natural  
23 selection with the evolution of maladaptation, 3) it explicitly includes density-dependent  
24 fitness through negative social effects that depend on the number of interacting conspecifics,  
25 and 4) its allows mean fitness to evolve even when direct genetic variance in fitness is zero,  
26 if related individuals interact and/or if there is multilevel selection. In summary, considering  
27 fitness in the context of indirect genetic effects aligns important theorems of natural selection  
28 with many situations observed in nature and provides a useful lens through which we might  
29 better understand evolution and adaptation.

30

31 **Key words:** adaptation, evolution, fundamental theorem of natural selection, indirect genetic  
32 effects, maladaptation, natural selection

33

## 34 Fundamental theorems of evolution and adaptation

35 R. A. Fisher's "fundamental theorem of natural selection" (FTNS) is one of the most famous,  
36 and still widely debated ideas in evolutionary biology (Fisher 1930). Following careful re-

37 evaluation by G. R. Price, it is generally understood that Fisher's FTNS should be  
38 understood as: In any population at any time, the rate of change of fitness ascribable to  
39 natural selection is equal to its additive genetic variance at that time (Price 1972). This is:

40

$$41 \quad \Delta \bar{W} = V_{A,W} \quad 1$$

42

43 Where  $\Delta \bar{W}$  refers to the change in mean fitness from one generation to the next caused by  
44 natural selection, and  $V_{A,W}$  is the additive genetic variance in fitness. Fitness here is "lifetime  
45 breeding success" or similar, i.e. an absolute value, as Fisher related it to population growth  
46 (Fisher 1930). Recent commentators have concluded that the FTNS is essentially true, and  
47 in the way Fisher meant it (Bijma 2010a; Grafen 2015; Birch 2016). Therefore, when  $V_{A,W} >$   
48 0, natural selection is causing mean fitness to increase. Note that mean fitness may also be  
49 increased or decreased by changes in the environment, hence the change ascribable to  
50 natural selection may not be equal to observed changes in fitness, but for our purposes here  
51 we assume a constant abiotic environment.

52 Independently derived, but fundamentally linked (Queller 2017), is the Price identity  
53 (Price 1970; hereafter the PI, note a similar expression, but lacking the second term, was  
54 derived earlier by A. A. Robertson 1966):

55

$$56 \quad \Delta \bar{P} = cov_A(\omega, P) + E(\omega \Delta P) \quad 2$$

57

58 Where  $\Delta \bar{P}$  refers to the change in mean phenotypic trait value from one generation to the  
59 next, and  $cov_A(\omega, P)$  to the additive genetic covariance between individuals' relative fitness  
60 ( $\omega$ , equal to  $\frac{W}{\bar{W}}$ ) and some phenotype ( $P$ ) and  $E(\omega \Delta P)$  is the change in mean phenotype  
61 between parents and offspring, which could be caused by a bias in meiosis or fertilisation, or  
62 by changes in the environment, which is referred to as "transmission bias". This simple but  
63 powerful expression for the expected change in phenotypes states that for evolution to  
64 occur, there must be a genetic covariance between relative fitness and the trait in question.

65 In typical treatments of trait evolution based on the Price identity, researchers  
66 assume that the transmission bias is equal to zero, which gives Robertson's expression for  
67 the evolution of traits (Robertson 1966). We do not contend this is incorrect, but we highlight  
68 later that a portion of the change partitioned to transmission bias will in fact often have an  
69 additive genetic basis, and therefore considering it explicitly is essential to understand  
70 evolutionary trajectories in some cases. Otherwise, we assume a constant abiotic  
71 environment throughout. Although it is not always appreciated, the PI implies that *for any*  
72 *trait to evolve there must be non-zero additive genetic variance in fitness*, otherwise the

73 genetic covariance is undefined and evolution does not proceed (Morrissey et al. 2010;  
74 Shaw and Shaw 2014).

75 The PI therefore makes clear that if any trait is evolving, there must be genetic  
76 variance in fitness. Further, if there is genetic variance in fitness ( $V_{A,W} > 0$ ), then according to  
77 the FTNS mean fitness must be increasing ( $\Delta\bar{W} > 0$ ). Conversely, if mean fitness is not  
78 being increased by natural selection ( $\Delta\bar{W} = 0$ ) then genetic variance in fitness must be zero  
79 ( $V_{A,W} = 0$ ) and so no trait can evolve. The combination of Fisher's FTNS and the PI,  
80 therefore, lead to the following statements:

81

82 *"If a trait is evolving by natural selection, there must be genetic variance in fitness, and so*  
83 *mean fitness is evolving"*

84 and

85 *"If a population's mean fitness is not evolving, then additive genetic variance in fitness must*  
86 *be zero, so no trait can evolve as a result of natural selection"*

87

88 We refer to situations where some trait is evolving in response to natural selection as  
89 "evolution by natural selection", while we refer to situations where mean fitness is increasing  
90 by evolution as "adaptation". Taking the FTNS and the PI together implies evolution by  
91 natural selection is *always* associated with adaptation. There are, of course, many ways in  
92 which changes in the environment might cause mean fitness to remain stationary or decline,  
93 but here we consider scenarios where the external environment remains constant.

94 In contradiction with these statements derived from the FTNS and PI, we clearly  
95 observe situations in nature where evolution occurs, but adaptation does not (Fisher 1941;  
96 Cooke et al. 1990; Frank and Slatkin 1992; Wolf et al. 2008). An example of this is that  
97 males with larger weapons, or preferred sexual displays, are expected to sire more offspring  
98 than their less well-endowed conspecifics. If these sexually selected male traits are  
99 heritable, we would expect the mean trait to change across generations; we therefore have a  
100 genetic covariance between the trait and fitness that is greater than zero. If so, there must  
101 be additive genetic variance in fitness, and so Fisher's FTNS predicts that mean fitness  
102 ought to evolve ( $\Delta\bar{W} > 0$ ). However, in reality there is no expectation that the *total* amount of  
103 reproductive success in the population will evolve, i.e. in this situation we would not expect  
104 females to start having more offspring, and so mean fitness is not expected to change.  
105 Therefore, no adaptation is occurring, and following Fisher's FTNS, genetic variance in fitness  
106 ought to be zero ( $V_{A,W} = 0$ ). Following the PI, evolution should then be impossible, yet we  
107 clearly expect the weapons or the display trait to evolve if they are heritable. This scenario  
108 also applies to any example of "soft" selection, where selection occurs among-individuals,

109 but does not lead to the mean reproductive output increasing (as opposed to “hard”  
110 selection, where selection does lead to an increase in mean fitness Wallace 1975). So how  
111 can we explain the action of sexual and soft selection, given that the FTNS and the PI are  
112 true? To put it another way, when mean fitness is not evolving, do we really expect all  
113 evolution to cease?

114 Furthermore, we can observe situations where trait evolution (requiring non-zero  
115  $V_{A,W}$ ) leads to reduced rather than increased fitness (“maladaptation”, distinct from situations  
116 where mean fitness is reduced purely by a change in the environment; Crespi 2000;  
117 Rogalski 2017). For example, *Agelenopsis aperta* spiders in riparian zones show suboptimal  
118 foraging and anti-predator behaviours compared to grassland populations, despite the  
119 riparian habitat being available for at least 100 years (Riechert 1993). The FTNS suggests  
120 that, as  $V_{A,W}$  cannot be less than zero,  $\Delta\bar{W}$  cannot be negative. Therefore, the FTNS seems  
121 incompatible with observations of the evolution of maladaptation.

122

### 123 Social interactions as part of the environment

124 This paradox can be resolved by revisiting an element of the PI that is typically set aside: the  
125 transmission bias. A transmission bias occurs when the mean phenotype of offspring and  
126 parents differ, but not due to evolutionary change (Frank 2012). Typical examples are when  
127 meiosis or fertilisation are not random with respect to the genes of interest, or when the  
128 environment has changed in some way, and organisms’ traits depend on this environment.  
129 Fisher too had a term for when phenotypes differ across generations due to environmental  
130 change (“environmental deterioration”), and noted that it would typically act to reduce mean  
131 fitness, which otherwise would continually increase (Fisher 1930). Fisher and others  
132 considered the competitiveness of conspecifics to be a key part of the environment (Fisher  
133 1930; Cooke et al. 1990; Frank and Slatkin 1992). Importantly, this “social environment” is  
134 partly genetic in basis (as social traits will be partly heritable like any other trait) and so can  
135 evolve (Griffing 1967; Moore et al. 1997). Hence a possible source of transmission bias and  
136 environmental deterioration with limitless potential to continually change is the social  
137 environment. Here we contend that not only can the social environment evolve, but that with  
138 respect to many situations there are strong reasons to believe that *the social environment*  
139 *must evolve*. Explicitly considering the evolution of the social environment and its influence  
140 on the evolution of transmission bias allows trait evolution and adaptation to become  
141 dissociated.

142 As an example of how the evolution of the social environment will dissociate trait  
143 evolution from adaptation, we can consider the evolution of the ability to win contests for  
144 dominance in a dyadic interaction, such as when two stags square off to determine who is

145 the strongest. Winning contests generally gives fitness benefits, and the propensity to win  
146 contests is also often heritable (Wilson et al. 2009, 2011), so we would expect the mean  
147 tendency to win such interactions to evolve. However, following Wilson and colleagues  
148 (2009, 2011; 2014), a “common-sense” approach sees this is impossible, because in every  
149 dominance interaction, there must be one winner and one loser, and hence the mean  
150 outcome in a dyadic contest is constrained to remain half winning and half losing in each  
151 generation. This is analogous to a situation where mean reproductive output cannot evolve,  
152 for instance when it is constrained at the population level by resource availability (be that  
153 food, territory space, or total offspring production of females in the case of sexual selection)  
154 even though increased reproductive output is always expected to be favoured by fecundity  
155 selection (Cooke et al. 1990; Frank and Slatkin 1992).

156 Common sense and models for micro-evolutionary change are reconciled by  
157 appreciating that individuals possess genetic effects for their *opponent's* ability to win the  
158 dominance interaction (Wilson et al. 2009, 2011; Wilson 2014). In a zero-sum contest, where  
159 one individual's success directly detracts from their competitor's success, genes that  
160 enhance an individual's chance of winning a contest necessarily reduce their opponent's  
161 chance of winning. As these genes will be selected for, the propensity to win evolves, but so  
162 too does the propensity for others to lose as a correlated response. As opponents are drawn  
163 from the same population, contests for dominance in the next generation are now with more  
164 competitive opponents, i.e. the environment has evolved to become more competitive at the  
165 same time (Wilson 2014). This leads to no change in mean phenotype overall. This has  
166 been termed the evolution of environmental deterioration as the environment the trait  
167 (winning contests) is being expressed in has deteriorated (i.e. it has become more difficult to  
168 express the trait; Fisher 1930). Crucially, there is still direct genetic variance in the  
169 population for dominance, and so breeding values for it will increase over time. As such,  
170 traits correlated with direct breeding values for the ability to win contests, such as weapon  
171 size, will still evolve.

172 We can consider the importance of the evolution of the social environment to trait  
173 evolution and adaptation in general by considering a quantitative genetic model of trait  
174 evolution that considers indirect genetic effects (IGEs). Indirect genetic effects occur when  
175 the phenotype of one individual is affected by the genotype of another individual (Moore et  
176 al. 1997). Examples include genes in mothers influencing offspring growth (McAdam and  
177 Boutin 2004), and genes in males influencing the date their partner lays a clutch (Brommer  
178 and Rattiste 2008). In general, the response to selection in the presence of IGEs is (Bijma  
179 and Wade 2008):

180

$$181 \quad \Delta \bar{P} = \beta_{W_D P} [V_{AD} + ncov_A(D, I)] \quad 4$$

182

183 Where  $\beta_{W_{DP}}$  is the selection gradient of an individual's direct phenotype on fitness,  $V_{AD}$  is the  
184 additive direct genetic variance in the trait,  $n$  is the number of conspecifics an individual  
185 interacts with (i.e. group size excluding itself, note this replaces  $n-1$  used by Bijma and Wade  
186 2008, as they set  $n$  as group size *including* the focal individual), and  $cov_A(D, I)$  is the additive  
187 genetic covariance between the direct and indirect effects on the trait. The product of  $\beta_{W_{DP}}$   
188 and  $V_{AD}$  is equivalent to the first term in the Price Identity in the absence of an environmental  
189 covariance between the trait and fitness (Rausher 1992). The product of  $\beta_{W_{DP}}$  and  
190  $ncov_A(D, I)$  represents the correlated evolution of the social environment that occurs  
191 because of the genetic covariance between an individual's effect on its own phenotype  
192 (direct genetic effect; DGEs) and its effect on the phenotype of others (IGEs). This is the  
193 correlated evolution of the social environment, or in other words a non-zero transmission  
194 bias. Equation 4 makes clear that, in the presence of covariance between DGEs and IGEs,  
195 transmission bias in the Price identity is non-random with respect to selection and clearly  
196 cannot be ignored. While transmission bias is often ignored because of an assumption that  
197 the environment remains constant, considering genetic variance in social interactions makes  
198 clear that in the presence of  $cov_A(D, I)$  the environment cannot remain constant; the social  
199 environment will necessarily evolve as a correlated response to selection. In the extreme  
200 example of contests for dominance, the resource for which individuals compete (success in  
201 a dyadic contest) is absolutely limited. However, as Cooke *et al.* (1990) observed, directional  
202 selection on any resource dependent trait can be counteracted by changes in the  
203 competitive environment, so the same IGE-based model can be applied to any trait  
204 dependent on contests for limited resources (Frank and Slatkin 1992; Wilson 2014). For  
205 instance, Muir *et al.* (2013) conducted an experiment on Japanese quail (*Coturnix japonica*),  
206 where they applied artificial selection for body mass, which possesses additive genetic  
207 variance. They observed no response to selection over 20 generations, despite the simple  
208 expectation that mean body mass would increase over time in response to artificial selection.  
209 In quail, however, body mass is a proxy for competitiveness with pen-mates for access to  
210 feed. The heaviest quail were, therefore, the ones that suppressed the body mass of their  
211 pen-mates the most, by outcompeting them for access to feed. As such, by artificially  
212 selecting the heaviest individuals, Muir *et al.* were also selecting for those that reduced the  
213 body mass of their pen mates the most. As these traits possessed additive genetic variance,  
214 the result was the evolution of direct breeding values for body mass, but also the evolution of  
215 breeding values for increased suppression of pen-mates' body masses. Therefore, there  
216 were DGEs for body mass, IGEs for the body mass of pen-mates, and a negative DGE-IGE  
217 covariance, overall giving no change in mean body mass. A similarly strong negative

218 covariance between direct and indirect genetic variance in performance was found for  
219 diameter at breast height in plantations of Eucalyptus trees (*Eucalyptus globulus*),  
220 presumably due to competition with neighbouring trees for light or other resources (Costa e  
221 Silva et al. 2013). In both these examples the competitive ability of individuals can evolve,  
222 but this leads to the evolution of equally more competitive social environments, and so mean  
223 of the trait under selection does not change across generations.

224

## 225 Indirect genetic effects on fitness

226 If we consider fitness as a trait influenced by social interactions, then conspecifics can  
227 influence each other's fitness following existing IGE models (Bijma 2011):

228

$$229 \quad W_i = \mu + C_i + \sum_n S_j + E_i \quad 5$$

230

231 Where individual  $i$ 's fitness ( $W_i$ ) depends on the population mean ( $\mu$ ), as well as  $i$ 's direct  
232 competitive ability ( $C_i$ ), the sum of the social effects of its  $n$  neighbours ( $\sum_n S_j$ ) and an  
233 environmental/residual component ( $E_i$ ; Bijma 2011). This is an analogous framework to the  
234 one proposed by Cooke *et al.* (1990), for the evolution of clutch size in birds, subsequently  
235 built upon by Frank and Slatkin (1992). This simply says that an individual's fitness will be  
236 influenced by its own competitive ability (e.g. its weapon size) but also by the competitive  
237 abilities of other individuals in the group/population (see also models for "social selection",  
238 e.g. Goodnight et al. 1992; Eldakar et al. 2010).

239 If we wish to consider how these social effects might constrain or facilitate the  
240 evolution of fitness, we need to consider the genetic basis of competitive ability and social  
241 effects on others' fitness (following Cooke *et al.* (1990) and Frank and Slatkin 1992). The  
242 direct competitive abilities of individuals can be partitioned to an additive genetic component  
243 and a non-genetic component. Similarly, an individual's social effects can be divided into  
244 genetic and non-genetic effects on its competitors' fitness. There is, therefore, additional  
245 genetic variance in fitness, stemming from competitors, alongside the more traditionally  
246 considered direct genetic variance stemming from the focal individual. This additional  
247 genetic variance can contribute to the evolution of fitness. The expected change in mean  
248 fitness in the presence of IGEs (when unrelated individuals interact and in the absence of  
249 multilevel selection) is given by (note that, as fitness is always maximally selected upon,  
250 while the relationship between fitness and fitness passes through zero and is linear,  $\beta_{W_{DP}}$  is  
251 at the maximum of 1; Hereford et al. 2004):

252

$$253 \quad \Delta \bar{W} = V_{AD,W} + ncov_A(D_W, I_W) \quad 6$$

254

255 There are two important things to note from eq. 6. First, when  $cov_A(D_W, I_W)$  is 0, we recover  
256 the FTNS. This would be true, however, only when there is no intra-specific competition.  
257 Instead, often an individual's fitness gains will necessarily detract at least somewhat from the  
258 fitness of others and  $cov_A(D_W, I_W)$  will be negative. A negative  $cov_A(D_W, I_W)$  will reduce the  
259 rate of evolution of mean fitness, which we have seen is a result of the evolution of a  
260 deteriorating environment. If  $cov_A(D_W, I_W)$  is sufficiently negative,  $\Delta\bar{W}$  can equal 0 despite  
261  $V_{AD,W}$  being non-zero. This will occur when fitness is completely zero-sum, such that any  
262 fitness accrued by one individual is equal to the fitness lost by a competitor or competitors  
263 (e.g. contests over a limited resource). Therefore,  $cov_A(D_W, I_W)$  represents an explicit  
264 measure of the degree to which adaptation will be constrained by competition, thereby  
265 counteracting the continual evolution of increased mean fitness as predicted by the FTNS  
266 (c.f. Cooke et al. 1990; Frank and Slatkin 1992).  $cov_A(D_W, I_W)$  also represents an explicit  
267 modelling of environmental deterioration, and of a form of transmission bias, in terms of the  
268 contribution of IGEs (changes in the social environment) to the change in mean fitness.  
269 Direct breeding values for fitness are still expected to increase across generations, as  
270 selection for fitness always occurs. The effect on fitness at the phenotypic level, however, is  
271 counterbalanced by the evolution of an increasingly competitive (deteriorating) environment  
272 resulting from IGEs on fitness (Cooke et al. 1990; Frank and Slatkin 1992). The degree to  
273 which fitness increases are counterbalanced by a deteriorating social environment, and  
274 hence the degree to which fitness is zero-sum is measured by  $cov_A(D_W, I_W)$ .

275

## 276 Evolution without adaptation

277 While fitness IGEs might constrain the evolution of mean fitness (adaptation), the continued  
278 evolution of DGEs on fitness means that traits correlated with fitness DGEs can still evolve  
279 (unless these traits are also subject to IGEs; see Box 1). This is analogous to the situation  
280 observed by Muir *et al.* discussed above. In Muir *et al.* (2013), body mass could not evolve  
281 as it was subject to IGEs, but the competitiveness of individual quail was able to evolve. This  
282 commonly occurs in livestock selected for increased yields, when pecking or biting  
283 behaviours increase across generations, but yields do not (Ellen et al. 2014). This occurs  
284 because traits related to social competition (e.g. aggressive pecking) are correlated with the  
285 *direct* additive genetic variance in the yield trait (e.g. body mass). Traits related to social  
286 competition can, therefore, increase, while overall performance (e.g. yield) remains constant  
287 because of the evolution of more competitive environments. In the case of fitness, traits  
288 related to fitness, such as weapon size or the brightness of a sexual display trait, can evolve  
289 over time even when mean fitness does not evolve (but see Box 1). This, therefore, solves



290 the apparent problem posed by the two statements we made at the start of this paper.  
291 Evolution occurring in populations where mean fitness is not evolving is in fact compatible  
292 with Fisher's FTNS and the PI once IGEs on fitness are considered. Furthermore, evolution  
293 without adaptation is absolutely required for the evolution of environmental deterioration to  
294 occur (in the form of the evolution of more competitive rivals), yet this is often not made  
295 explicit. If traits related to competitive ability cannot evolve then the environment cannot  
296 deteriorate in this manner.

297         Neither the general ideas, nor models that we have outlined here are new. Applying  
298 these ideas and models to fitness itself, however, clarifies when evolution and adaptation are  
299 expected to occur, and when they are not. Arguably, Fisher would have classified all  
300 changes in indirect effects as environmental deterioration, meaning that we should not  
301 model them explicitly here. However, as this change has an additive genetic basis and is  
302 correlated with changes in fitness due to direct genetic effects, it seems essential to include  
303 them in our models for the evolution of fitness. Furthermore, there are additional insights into  
304 trait evolution and adaptation that come from considering IGEs on fitness and fitness-related  
305 traits.

306

### 307 The evolution of maladaptation

308 An interesting outcome of models for evolution in the presence of IGEs is that traits can  
309 respond in the *opposite* direction to selection if a negative  $cov_A(D, I)$  outweighs the influence  
310 of direct effects (Griffing 1967; Moore et al. 1997; more formally, when  $-1(cov_A(D, I)) >$   
311  $V_{AD}/n$ ). In these cases, selection favours individuals whose indirect effects reduce the  
312 population mean more than their direct effects increase it. What this means for the evolution  
313 of fitness is that, although  $V_{AD,W}$  can never be less than zero,  $\Delta\bar{W}$  can be negative (i.e. the  
314 evolution of maladaptation), if  $cov_A(D_W, I_W)$  is strong enough ( $-1(cov_A(D_W, I_W)) >$   
315  $V_{AD,W}/n$ ; note this is analogous to the possible decrease in mean fitness when selection acts on  
316 linked loci (Moran 1963), just that the fitness effects of the loci are observed in different  
317 individuals). This is distinct from cases where fitness decreases due to a deterioration in the  
318 non-social or abiotic environment, as the change in fitness caused by evolution of IGEs is  
319 the direct result of selection (effectively for individuals that suppress others the most). Such  
320 an effect has been observed in populations of flour beetles (*Tribolium castaneum*), where  
321 artificial selection for individuals with *increased* reproductive output caused the mean  
322 reproductive output across the populations to *decrease* over time (Wade 1976). This may  
323 apply more generally to populations that are approaching or above a habitat's carrying  
324 capacity, and so mean fitness is expected to decline in subsequent generations. That the  
325 FTNS only ever allowed for an increase in fitness (adaptation, but not maladaptation) has

326 been one of its major criticisms (Frank and Slatkin 1992). Modelling the evolution of fitness  
327 in the presence of IGEs allows maladaptation to occur, reconciling the FTNS with empirical  
328 observations.

329

### 330 Indirect genetic effects and density dependence

331 Including IGEs in the expected change in mean fitness also leads to useful links between  
332 quantitative genetics and population biology. For instance, eq. 6 takes similar form to the  
333 logistic model of density-dependent per capita population growth:

334

$$335 \quad \frac{dn}{N dt} = r - rNK^{-1} \quad 7$$

336

337 In the logistic model the rate of per capita population growth ( $\frac{dn}{N dt}$ ) is positively affected by  
338 the intrinsic rate of increase of the population ( $r$ ), while  $-rNK^{-1}$  represents the degree to which  
339 per capita population growth is reduced by per capita increases in death rates and  
340 decreases in birth rates as the population approaches its carrying capacity ( $K$ ). Such density  
341 dependence results from social interactions (such as competition for space or food) among  
342 individuals that cause them to suppress the birth rate or increase the death rate of others.  
343 These social effects may well have a genetic component, and hence be IGEs. When  
344 populations are far below  $K$ , indirect effects on fitness are expected to be relatively weak. In  
345 this scenario  $V_{AD,W}$  can exceed  $ncov_A(D_W, I_W)$  and mean fitness can evolve. This is  
346 analogous to r-selection, as a low contribution from  $ncov_A(D_W, I_W)$  due to non-limiting  
347 resources allows the evolution of fitness and so rapid population growth. However, as the  
348 population size approaches  $K$ , negative social effects on fitness become stronger, and  
349  $ncov_A(D_W, I_W)$  will eventually be large enough to equal  $V_{AD,W}$ , and mean fitness can no  
350 longer evolve. The change in mean fitness may even reduce below zero, causing the  
351 population size to return below  $K$ .

352 Density-dependent selection has typically been modelled from a framework where  
353 genotypes differ in their sensitivity to competition, which has led to the prediction of the  
354 evolution of increased carrying capacity at high density (an increase in “efficiency” of  
355 organisms; MacArthur 1962). The model including IGEs on fitness, however, makes an  
356 additional prediction: at high density, we expect the evolution of increased ability to depress  
357 the survival and reproduction of others as the population approaches carrying capacity (in  
358 Fisher’s words: “life is made somewhat harder to each individual when the population is  
359 larger”; Fisher 1930). This process ought to result in the evolution of *reduced*  $K$ . It is not  
360 currently clear the degree to which density dependent selection in nature favours increased  
361 efficiency versus enhanced ability to suppress the fitness of others.

362 It is tempting to directly relate the group size,  $n$ , in eq. 6 with the population size,  $N$ ,  
363 in eq. 7, but these are not necessarily equivalent. All individuals within a population are  
364 unlikely to interact with one another socially to the degree that they might depress one  
365 another's fitness, so if population size ( $N$ ) increases but density does not (i.e. the population  
366 expands into uninhabited space) then the number of socially interacting individuals ( $n$ ) will  
367 not change. It is also generally expected that larger groups sizes should weaken  
368  $cov_A(D_W, I_W)$ , as more distant or more weakly interacting individuals who do not influence  
369 each other's fitness are included within progressively larger groups (Fig. 1, top panel, see  
370 also Bijma 2010b). If, however increasing population size implies greater *density*, as well as  
371 simply more individuals, then social interactions may well get more intense (Fig. 1, bottom  
372 panel). This would imply a greater, or at least stationary,  $cov_A(D_W, I_W)$  as  $n$  increases, and  
373 so the product  $ncov_A(D_W, I_W)$  would contribute increasingly to  $\Delta\bar{W}$ . The explicit inclusion of  
374 IGEs on fitness, therefore, results in the emergence of density-dependent per capita  
375 reproduction through social effects.

376 The magnitude of the reduction in  $\Delta\bar{W}$  caused by a negative  $cov_A(D_W, I_W)$  depends  
377 on how completely mean fitness in the population is constrained. Mild constraints will mean  
378 a  $cov_A(D_W, I_W)$  closer to zero (but still negative), and therefore a reduced, but not completely  
379 eliminated, increase in mean fitness across generations. Absolute constraints mean a strong  
380 negative  $cov_A(D_W, I_W)$ , and no change in mean fitness (no adaptation) or even a decrease  
381 (maladaptation). Therefore, the difference between  $V_{AD,W}$  and  $ncov_A(D_W, I_W)$  is a measure  
382 of the magnitude of the constraints on the evolution of mean fitness. How  $cov_A(D_W, I_W)$   
383 changes with  $n$  is an indication of the strength of density dependence, but cannot be  
384 predicted beforehand. This instead remains an empirical question to be answered.  
385  $cov_A(D_W, I_W)$  can be converted to a correlation between an individual's direct and indirect  
386 genetic effects on fitness to compare across populations, with 0 indicating no constraints and  
387 -1 indicating complete constraints, as found when analysing the evolution of dominance  
388 contests (Wilson et al. 2009, 2011; Sartori and Mantovani 2013). Positive values would  
389 indicate synergistic effects such as Allee effects (Allee 1931). In terms of hard and soft  
390 selection, a correlation of 0 would indicate that selection is hard (not dependent on the traits  
391 of others and leads to adaptation) while a correlation of -1 would indicate that selection is  
392 completely soft (entirely dependent on the trait of an individual relative to others and does  
393 not lead to adaptation).

394

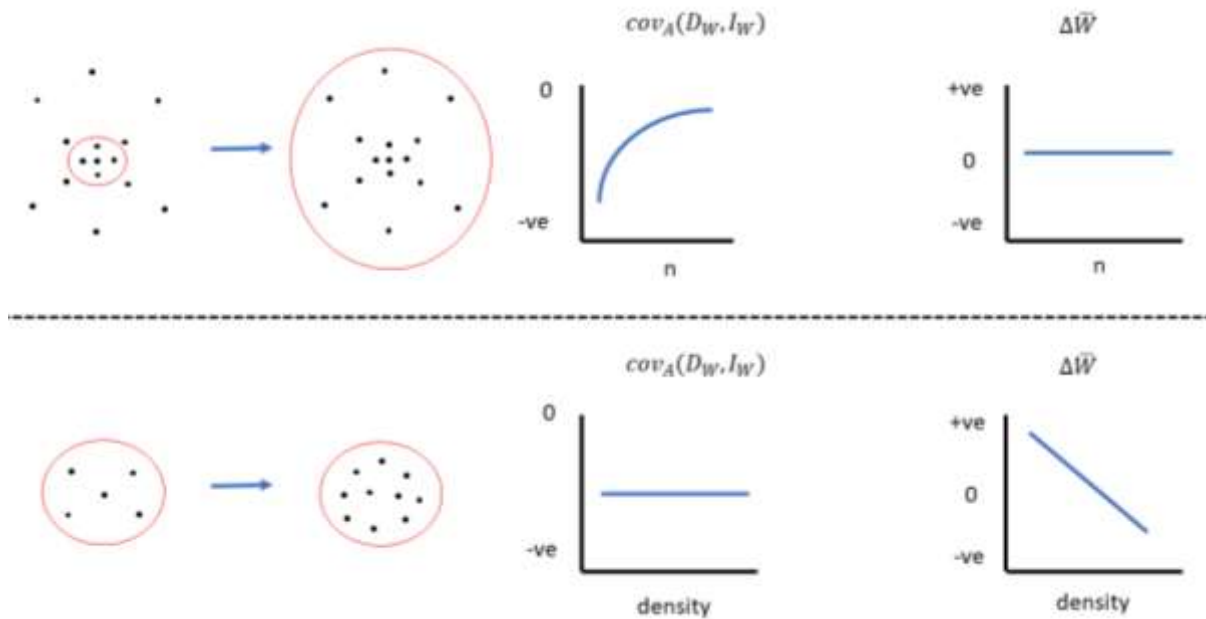

395

396

397

398

399

400

401

402

403

404

405

406

407

408

409

410

411

412

413

414

415

416

417

418

Figure 1. The relationship between  $n$ , density,  $cov_A(D_W, I_W)$ , and expectations for  $\Delta\bar{W}$ . Here we assume that the fitness of individuals is based on competition for limited resources, and so  $cov_A(D_W, I_W)$  ranges from 0 to strongly negative. If we simply increase the number of individuals considered (top panel), then we expect  $cov_A(D_W, I_W)$  to approach 0, as the additional individuals are less closely associating with each other, decreasing the mean social effect individuals have on each other. This balances the increase in  $n$ , giving a stationary  $\Delta\bar{W}$ . Here we have depicted  $\Delta\bar{W}$  remaining at 0, assuming the population has reached a point that resources are completely preventing further evolution of increased reproduction. If, however, we increase the density of the individuals, as well as their number (bottom panel), then the  $cov_A(D_W, I_W)$  may be stationary, or even become more negative, as the number of individuals increases. This reduces  $\Delta\bar{W}$ , in our example from an initial period of increasing fitness (below  $K$ ), through no change (at  $K$ ) and then to a decline (above  $K$ ). This is the emergence of density dependent reproduction, only apparent through the FTNS when IGEs for fitness are considered.

### Adaptation when direct genetic variance in fitness is zero

A final outcome of considering IGEs on fitness is that fitness can evolve (adaptation or maladaptation can occur) in populations where direct genetic variance in fitness is zero ( $V_{AD,W} = 0$ ), if there are IGEs on the fitness of *related* conspecifics. When unrelated individuals interact, if  $V_{AD,W}$  is zero,  $cov_A(D_W, I_W)$  is then undefined and, following eq. 6,  $\Delta\bar{W}$  is zero. However, if related individuals interact, the expected change in mean fitness follows (Bijma and Wade 2008):

419 
$$\Delta\bar{W} = r[V_{AD,W} + 2n \text{cov}_A(D_W, I_W) + n^2V_{AI,W}] + (1 - r)[V_{AD,W} + n\text{cov}_A(D_W, I_W)] \quad 8$$

420

421 Where  $r$  is the mean coefficient of relatedness between interacting individuals,  $V_{AI,W}$  is the  
422 additive indirect genetic variance for fitness, and other terms are as defined for eq. 6. This  
423 allows a change in mean fitness when  $V_{AD,W}$  and  $\text{cov}_A(D_W, I_W) = 0$ , as long as  $V_{AI,W} > 0$  and  $r$   
424  $\neq 0$ :

425

426 
$$\Delta\bar{W} = rn^2V_{AI,W} \quad 9$$

427

428 So, in contrast with a simple interpretation of FTNS, population mean fitness can evolve  
429 even in the absence direct genetic variance in fitness, as long as fitness-relevant social  
430 interactions are with relatives and there are IGEs for fitness. Note in these equations for the  
431 response to selection in the presence of IGEs,  $r$  can be replaced without altering the  
432 equations by  $g$ , the relative strength of multilevel selection (Bijma and Wade 2008). As such,  
433 the presence of multilevel selection can also allow adaptation (or maladaptation) to occur  
434 when  $V_{AD,W}$  is zero, as long as  $V_{AI,W} > 0$  and  $g \neq 0$  (see Bijma and Wade 2008 for when both  $r$   
435 and  $g$  are non-zero, and see also McGlothlin et al. 2010).

436 Given that populations in equilibrium conditions are typically expected to show very  
437 little  $V_{AD,W}$  (Fisher 1930), this provides a mechanism for those populations to still adapt. For  
438 instance, in a population of North American red squirrels (*Tamiasciurus hudsonicus*)  $V_{AD,W}$   
439 was found to be essentially zero, but maternal genetic effects on fitness were present  
440 (McFarlane et al. 2015). Maternal genetic effects are a specific form of IGE where a mother's  
441 genes (e.g. for milk production) influence the traits of her offspring. When parents interact  
442 with offspring,  $r$  is non-zero. Models for evolution in the presence of maternal genetic effects  
443 are then valid, which allows the population to evolve, albeit with a lag due to the cross-  
444 generational effect (Kirkpatrick and Lande 1989; Mousseau and Fox 1998). Therefore,  
445 fitness can change from generation to generation, despite lacking direct additive genetic  
446 variance. This is not a new result, as evolution and adaptation in the presence of maternal  
447 genetic effects and IGEs in general is accepted. Worth noting is that, as direct breeding  
448 values for fitness are not changing across populations, the breeding values for any traits  
449 genetically correlated with these will also not change. A trait may evolve, however, if it is  
450 genetically correlated with indirect breeding values for fitness.

451

## 452 Conclusions

453 Fig. 2 illustrates four situations which correspond to our formulation for the change in mean  
454 fitness we have outlined above (although we do not plot the case where DGEs for fitness are

455 absent but IGEs among relatives and/or in the presence of multilevel selection do occur, see  
456 the section on “Adaptation when direct genetic variance in fitness is zero”). These represent  
457 a complete range of cases: when DGEs for fitness are either absent or present, when IGEs  
458 are either absent or present, and if both DGEs and IGEs are present, if they positively or  
459 negatively covary. We indicate the consequences each situation has for the expected  
460 evolution of mean fitness (adaptation), as well as for the evolution of other traits within the  
461 population (evolution by natural selection). These demonstrate that considering the evolution  
462 of fitness as the response to selection in the presence of IGEs allows us to account for many  
463 situations observed in nature and captive breeding. Frank and Slatkin stated that  
464 “fitness...increases by an exact amount because of natural selection but simultaneously  
465 increases or decreases by an unpredictable amount because of the environment”(Frank and  
466 Slatkin 1992). We hope we have shown here that, by incorporating IGEs into our models, a  
467 portion of this change caused by the environment is predictable.

468 In summary, considering IGEs on fitness allows us to reconcile the FTNS and the PI  
469 with several observations: 1) it allows evolution even when adaptation is not occurring. This  
470 was acknowledged by Fisher, and is implied by models for trait evolution in the presence of  
471 IGEs, but appears impossible under conventional understandings of the FTNS and PI. 2) It  
472 allows the evolution of maladaptation, reconciling the FTNS with empirical observations. 3)  
473 Including  $n$  in the equation for the change in mean fitness reveals density-dependence,  
474 helping to link quantitative genetics to population biology. 4) It indicates when adaptation can  
475 occur even when direct genetic variance in fitness is lacking. Considering IGEs on fitness  
476 explicitly models the deterioration of the social environment, a type of transmission bias, and  
477 so clarifies how both the evolution of traits and the adaptation of populations is expected to  
478 proceed.

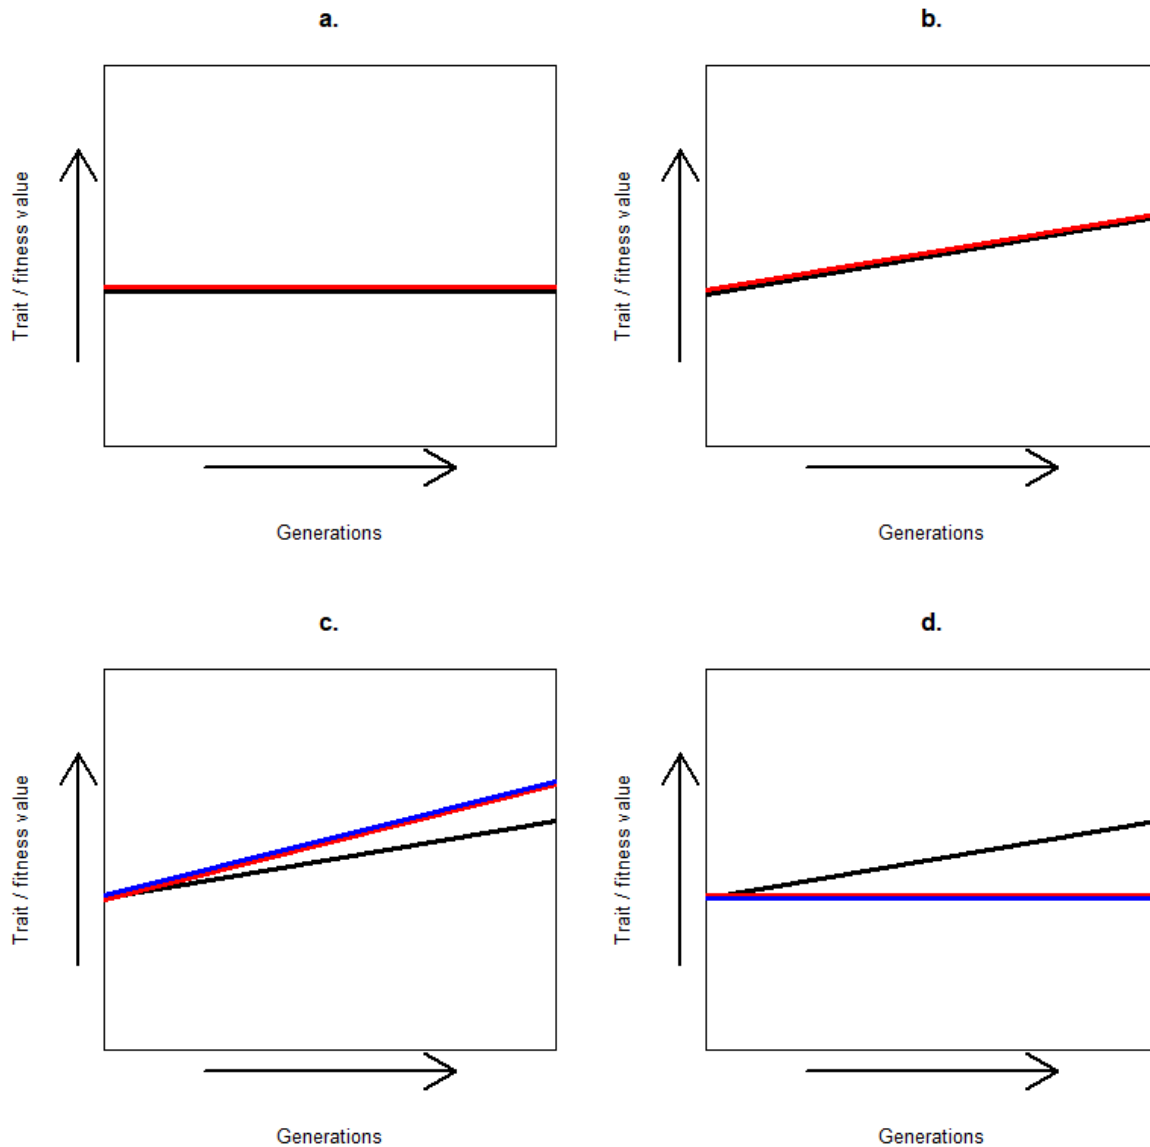

479

480 Figure 2a-d. How fitness (red) and a trait (black) are expected to change across generations.  
481 Note the scale for both the trait and fitness is arbitrary; we do not necessarily expect a trait  
482 and fitness to increase at exactly the same rate in scenario b. for example. For simplicity we  
483 assume that interactions are with non-relatives ( $r = 0$ ) and there is no multilevel selection ( $g =$   
484  $0$ ). a: No DGEs for fitness, no IGEs. No genetic variance in fitness. Neither adaptation nor any  
485 evolution will occur. b: DGEs for fitness, but no IGEs. Heritable variance in fitness is present,  
486 and so mean fitness is expected to evolve over time in line with the FTNS. Traits genetically  
487 correlated with fitness are also able to evolve. Both adaptation and evolution can occur. c:  
488 DGEs and IGEs for fitness, positive DGE-IGE covariance. Heritable variance in fitness is  
489 present, and so mean fitness is expected to increase over time, and rapidly as the positive  
490 DGE-IGE covariance shifts the response in the same direction as selection. Traits genetically  
491 correlated with fitness will evolve, although only as fast as fitness if they too are influenced by  
492 IGEs (blue line). Evolution and rapid adaptation. d: DGEs and IGEs for fitness, negative DGE-

493 IGE covariance for fitness. The expected evolution of fitness will be reduced, possibly to zero  
494 or even below. However, as direct breeding values for fitness will still be increasing across  
495 generations, traits genetically correlated with fitness may evolve, unless they too are influence  
496 by IGEs (blue line). This corresponds to situations where livestock under artificial selection for  
497 increased yield have shown no evolution of yield but do show increases in aggressive  
498 behaviours such as biting or pecking, as well as the instances of sexual selection described  
499 in the text. Evolution but no adaptation.

500

## 501 [Acknowledgements](#)

502 We thank Cortland Griswold, Loeske Kruuk, Alastair Wilson and Piter Bijma for comments  
503 and discussions that greatly improved this manuscript. We have no conflicts of interest.

504

## 505 [Author contributions](#)

506 Both authors conceived of the research question, drafted the manuscript, and approved the  
507 final version. DNF made the figures.

508

## 509 [Funding statement](#)

510 No funding source is directly responsible for this manuscript.

511

## 512 [References](#)

- 513 Allee, W. 1931. *Animal aggregations, a study in general sociology*. University of Chicago  
514 Press, Chicago.
- 515 Bijma, P. 2011. A general definition of the heritable variation that determines the potential of  
516 a population to evolve. *Genetics* 189:1347–1359.
- 517 Bijma, P. 2010a. Fisher’s fundamental theorem of inclusive fitness and the change in fitness  
518 due to natural selection when conspecifics interact. *J. Evol. Biol.* 23:194–206. Blackwell  
519 Publishing Ltd.
- 520 Bijma, P. 2010b. Multilevel selection 4: Modeling the relationship of indirect genetic effects  
521 and group size. *Genetics* 186:1029–31. Genetics Society of America.
- 522 Bijma, P., and M. J. Wade. 2008. The joint effects of kin, multilevel selection and indirect  
523 genetic effects on response to genetic selection. *J. Evol. Biol.* 21:1175–88.
- 524 Birch, J. 2016. *Natural selection and the maximization of fitness*. *Biol. Rev.* 91:712–727.  
525 Blackwell Publishing Ltd.
- 526 Brommer, J. E., and K. Rattiste. 2008. “Hidden” reproductive conflict between mates in a  
527 wild bird population. *Evolution* 62:2326–33.



- 528 Cooke, F., P. Taylor, C. Francis, and R. Rockwell. 1990. Directional selection and clutch size  
529 in birds. *Am. Nat.* 136:261–267.
- 530 Costa e Silva, J., B. M. Potts, P. Bijma, R. J. Kerr, and D. J. Pilbeam. 2013. Genetic control  
531 of interactions among individuals: Contrasting outcomes of indirect genetic effects  
532 arising from neighbour disease infection and competition in a forest tree. *New Phytol.*  
533 197:631–641.
- 534 Crespi, B. J. 2000. The evolution of maladaptation. *Heredity (Edinb.)*. 84:623. Wiley/Blackwell  
535 (10.1111).
- 536 Eldakar, O. T., D. S. Wilson, M. J. Dlugos, and J. W. Pepper. 2010. The role of multilevel  
537 selection in the evolution of sexual conflict in the water strider *Aquarius remigis*.  
538 *Evolution (N. Y.)*. 64:3183–3189.
- 539 Ellen, E. D., T. B. Rodenburg, G. A. A. Albers, J. E. Bolhuis, I. Camerlink, N. Duijvesteijn, E.  
540 F. Knol, W. M. Muir, K. Peeters, I. Reimert, E. Sell-Kubiak, J. A. M. van Arendonk, J.  
541 Visscher, and P. Bijma. 2014. The prospects of selection for social genetic effects to  
542 improve welfare and productivity in livestock. *Front. Genet.* 5:377. Frontiers Research  
543 Foundation.
- 544 Fisher, R. A. 1930. *The Genetical Theory of Natural Selection*. Oxford University Press.
- 545 Fisher, R. a. 1941. Average excess and average effect of a gene substitution. *Annu. Eugen.*  
546 11:53–63. Blackwell Publishing Ltd.
- 547 Frank, S. A. 2012. Natural selection. III. Selection versus transmission and the levels of  
548 selection. *J. Evol. Biol.* 25:227–43. NIH Public Access.
- 549 Frank, S. A., and M. Slatkin. 1992. Fisher's fundamental theorem of natural selection.  
550 *Trends Ecol. Evol.* 7:92–95.
- 551 Goodnight, C. J., J. M. Schwartz, and L. Stevens. 1992. Contextual analysis of models of  
552 group selection, soft selection, hard selection, and the evolution of altruism. *Am. Nat.*  
553 140:743–761.
- 554 Grafen, A. 2015. Biological fitness and the Fundamental Theorem of Natural Selection. *Am.*  
555 *Nat.* 186:1–14. University of Chicago PressChicago, IL.
- 556 Griffing, B. 1967. Selection in reference to biological groups. I. Individual and group selection  
557 applied to populations of unordered groups. *Aust. J. Biol. Sci.* 20:127–39.
- 558 Hereford, J., T. F. Hansen, and D. Houle. 2004. Comparing strengths of directional selection:  
559 How strong is strong? *Evolution (N. Y.)*. 58:2133.
- 560 Kirkpatrick, M., and R. Lande. 1989. The evolution of maternal characters. *Evolution (N. Y.)*.  
561 43:485–503.
- 562 MacArthur, R. 1962. Some generalized theorems of natural selection. *Proc. Natl. Acad. Sci.*  
563 48:1893–1897. National Academy of Sciences.
- 564 McAdam, A. G., and S. Boutin. 2004. Maternal effects and the response to selection in red

- 565 squirrels. *Proc. R. Soc. B Biol. Sci.* 271:75–79. The Royal Society.
- 566 McFarlane, S. E., J. C. Gorrell, D. W. Coltman, M. M. Humphries, S. Boutin, and A. G.  
567 McAdam. 2015. The nature of nurture in a wild mammal's fitness. *Proc. R. Soc. B Biol.*  
568 *Sci.* 282:20142422–20142422.
- 569 McGlothlin, J. W., A. J. Moore, J. B. Wolf, and E. D. Brodie. 2010. Interacting phenotypes  
570 and the evolutionary process. III. Social evolution. *Evolution* 64:2558–74.
- 571 Moore, A. J., E. D. I. Brodie, and J. B. Wolf. 1997. Interacting phenotypes and the  
572 evolutionary process: I. Direct and indirect genetic effects of social interactions.  
573 *Evolution* (N. Y). 51:1352–1362.
- 574 Moran, P. A. P. 1963. On the nonexistence of adaptive topographies. *Ann. Hum. Genet.*  
575 27:383–393. Wiley/Blackwell (10.1111).
- 576 Morrissey, M. B., L. E. B. Kruuk, and A. J. Wilson. 2010. The danger of applying the  
577 breeder's equation in observational studies of natural populations. Blackwell Publishing  
578 Ltd.
- 579 Mousseau, T. A., and C. W. Fox. 1998. The adaptive significance of maternal effects. *Trends*  
580 *Ecol. Evol.* 13:403–407.
- 581 Muir, W. M., P. Bijma, and A. Schinckel. 2013. Multilevel selection with kin and non-kin  
582 groups, experimental results with japanese quail (*Coturnix japonica*). *Evolution* (N. Y).  
583 67:1598–1606.
- 584 Price, G. R. 1972. Fisher's "fundamental theorem" made clear. *Ann. Hum. Genet.* 36:129–  
585 140.
- 586 Price, G. R. 1970. Selection and covariance. *Nature* 227:520–521. Nature Publishing Group.
- 587 Queller, D. C. 2017. Fundamental theorems of evolution. *Am. Nat.* 189:345–353. University  
588 of Chicago PressChicago, IL.
- 589 Riechert, S. E. 1993. The evolution of behavioral phenotypes: Lessons learned from  
590 divergent spider populations. *Adv. Study Behav.* 22:103–134. Academic Press.
- 591 Robertson, A. 1966. A mathematical model of the culling process in dairy cattle. *Anim. Prod.*  
592 8:95–108. Cambridge University Press.
- 593 Rogalski, M. A. 2017. Maladaptation to acute metal exposure in resurrected *Daphnia*  
594 *ambigua* clones after decades of increasing contamination. *Am. Nat.* 189:443–452.  
595 University of Chicago PressChicago, IL.
- 596 Sartori, C., and R. Mantovani. 2013. Indirect genetic effects and the genetic bases of social  
597 dominance: evidence from cattle. *Heredity* (Edinb). 110:3–9. Nature Publishing Group.
- 598 Shaw, R., and F. Shaw. 2014. Quantitative genetic study of the adaptive process. *Heredity*  
599 (Edinb). 112:13–20. Nature Publishing Group.
- 600 Wade, M. J. 1976. Group selection among laboratory populations of *Tribolium*. *Proc. Natl.*  
601 *Acad. Sci.* 73:4604–4607.

- 602 Wallace, B. 1975. Hard and soft selection revisited. *Evolution* (N. Y). 29:465. Wiley/Blackwell  
603 (10.1111).
- 604 Wilson, A. 2014. Competition as a source of constraint on life history evolution in natural  
605 populations. *Heredity* (Edinb). 112:70–8. The Genetics Society.
- 606 Wilson, A. J., U. Gelin, M.-C. Perron, and D. Réale. 2009. Indirect genetic effects and the  
607 evolution of aggression in a vertebrate system. *Proc. R. Soc. B Biol. Sci.* 276:533–41.
- 608 Wilson, A. J., M. B. Morrissey, M. J. Adams, C. A. Walling, F. E. Guinness, J. M. Pemberton,  
609 T. H. Clutton-Brock, and L. E. B. Kruuk. 2011. Indirect genetics effects and evolutionary  
610 constraint: An analysis of social dominance in red deer, *Cervus elaphus*. *J. Evol. Biol.*  
611 24:772–783. Blackwell Publishing Ltd.
- 612 Wolf, J. B., W. E. Harris, and N. J. Royle. 2008. The capture of heritable variation for genetic  
613 quality through social competition. *Genetica* 134:89–97. Springer Netherlands.
